# Supplementary material for: One-Step Facile Synthesis of Aptamer-Modified Graphene Oxide for Highly Specific Enrichment of Human A-Thrombin in Plasma
Source: MDPI journal article supplement (doi:10.3390/s17091986), 2017-09-13
Supplement: s1 [file s1]

## **Supporting Information**

### **One-step facile synthesis of aptamer-modified graphene oxide for highly specific enrichment of human $\alpha$ -thrombin in plasma**

Yuan Xu, Siyuan Tan, Qionglin Liang\*, Mingyu Ding\*

Key Laboratory of Bioorganic Phosphorus Chemistry and Chemical Biology, Ministry of Education, Department of Chemistry, Tsinghua University, Beijing 100084, China

#### **\*Correspondence:**

Postal address: The Key Laboratory of Bioorganic Phosphorus Chemistry & Chemical Biology, Ministry of Education, Department of Chemistry, Tsinghua University, Beijing 100084, China.

E-mail address: dingmy@mail.tsinghua.edu.cn (Mingyu Ding)

liangql@mail.tsinghua.edu.cn (Qionglin Liang)

Tel: +86-10-62797087 (Ding); +86-10-62772263 (Liang)

## Supporting Figures

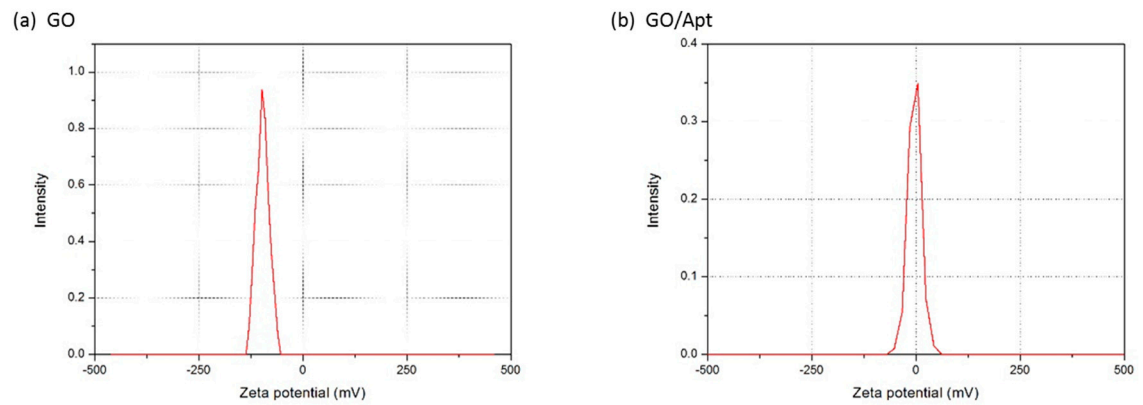

**Fig. S1.** Zeta potentials of GO and GO/Apt.

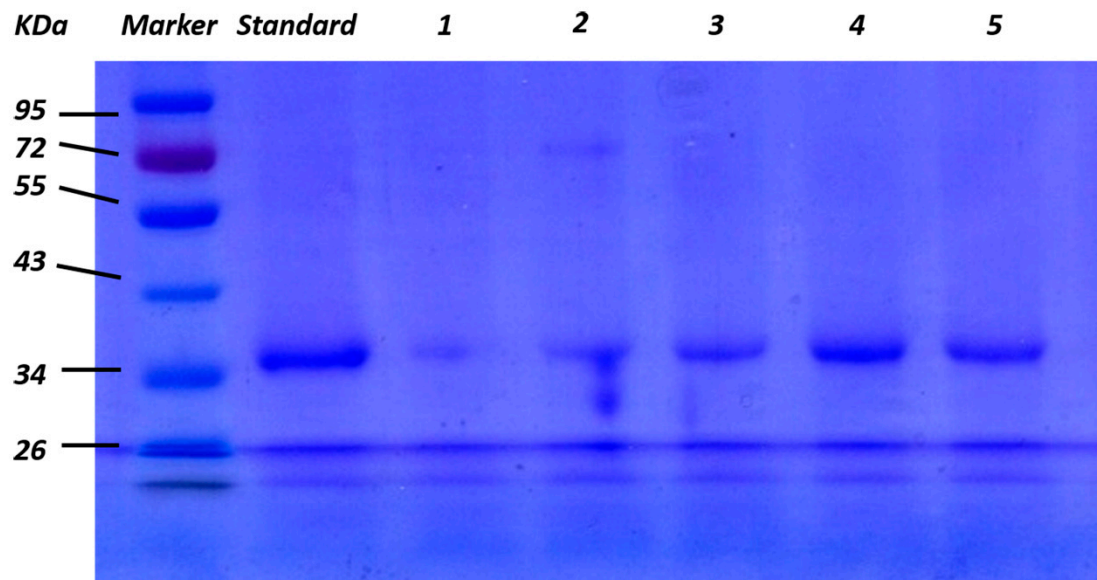

**Fig. S2** Gel electrophoresis result of captured  $\alpha$ -thrombin by 30, 20, 10, 5  $\mu$ g and 1  $\mu$ g (lane 1-5) GO/Apt nanocomposites.
